1 **Remodeling gut microbiota by *Streptococcus thermophilus* 19 attenuates inflammation in**  
2 **septic mice**

3 Fu Han<sup>\*a</sup>, Yijie Zhang<sup>\*ab</sup>, Xuekang Yang<sup>\*a</sup>, Zhuoqun Fang<sup>a</sup>, Shichao Han<sup>a</sup>, Xiaoqiang Li<sup>a</sup>, Weixia  
4 Cai<sup>a</sup>, Dan Xiao<sup>a</sup>, Jiaqi Liu<sup>a</sup>, Wanfu Zhang<sup>a</sup>, Gaofeng Wu<sup>a#</sup> & Dahai Hu<sup>a#</sup>

5 a Department of Burns and Cutaneous Surgery, Xijing Hospital, Fourth Military Medical  
6 University, Xi'an, Shaanxi Province, 710032, China

7 b Key Laboratory of Tissue Repair and Regeneration of PLA and Beijing Key Research  
8 Laboratory of Skin Injury, Repair and Regeneration, First Hospital Affiliated to General Hospital  
9 of PLA, Beijing, 100048, China

10 Running title: *Streptococcus thermophilus* 19 attenuates inflammation in septic mice

11 # Address correspondence to Gaofeng Wu, [15293136005@163.com](mailto:15293136005@163.com) and Dahai Hu,  
12 [hudahaidoc@163.com](mailto:hudahaidoc@163.com).

13 \*Fu Han, Yijie Zhang and Xuekang Yang contributed equally to this work

14 **Abstract**

15 Sepsis is a life-threatening organ dysfunction caused by a dysregulated host response to infection  
16 and is the leading cause of death in burn patients. *Streptococcus thermophilus* 19 is a highly  
17 effective probiotic, with well-studied health benefits, but its role in protecting viscera against  
18 injury caused by sepsis and the underlying mechanism is poorly understood. The goal of this  
19 study was to evaluate protection potency of *S. thermophilus* against inflammation in mice and  
20 evaluate the influence of sepsis and *S. thermophilus* on microbial community. We tested the  
21 utility of *S. thermophilus* 19 in attenuating inflammation *in vitro* and *vivo* of LPS-induced sepsis

22 mouse model. We also evaluated the influence of sepsis and *S. thermophilus* on microbial  
23 community. In *vitro*, *S. thermophilus* 19 decrease the expression of inflammatory factors.  
24 Additionally, in a lipopolysaccharide-induced septic mouse model, mice administered the  
25 probiotic 19 was highly resistant to Lps and exhibited decreased expression of inflammatory  
26 factors compared to Lps-treated control mice. A MiSeq-based sequence analysis revealed that gut  
27 microbiota alterations in mice intraperitoneally injected with 1 mg/ml LPS were mitigated by the  
28 administration of oral probiotics 19. Together these findings indicate that *S. thermophilus* 19 may  
29 be a new avenue for interventions against inflammation caused by sepsis and other systemic  
30 inflammatory diseases. In an analysis of the gut microbiota of the all group mice, we found that  
31 sepsis is associated with gut microbiota and probiotics attenuate the inflammation through  
32 remodeling gut microbiota.

33 **Importance** Sepsis is life-threatening organ dysfunction which is the leading cause of death in  
34 burn patients. Although our understanding of sepsis has increased substantially in recent years,  
35 it's still reported to be the leading cause of death in seriously ill patients. Evidences showed that  
36 gut microbiota play an important role in sepsis. Moreover, probiotics have been used to prevent  
37 numbers of gut health disorders and alleviate inflammation associated with some human diseases  
38 by promoting changes in the gut microbiota composition. Hence, to investigate the mechanism of  
39 probiotics in the treatment of sepsis has emerged. The significance of our research is in  
40 identifying the role of gut microbiota in sepsis and found an effective probiotic that reduces  
41 inflammation, *S. thermophilus* 19, and investigating the therapeutic effect and mechanism of *S.*  
42 *thermophilus* 19 on sepsis, which might be a new avenue for interventions against inflammation

43 caused by sepsis and other systemic inflammatory diseases.

44 **Key words**

45 Sepsis, inflammation, Probiotics, Microbiome

46 **Introduction**

47 Sepsis is a life-threatening organ dysfunction caused by a dysregulated host response to infection  
48 and is the leading cause of death in burn patients, responsible for up to 50 to 60% of burn injury  
49 deaths (1, 2). Although our understanding of sepsis has increased substantially in recent years, it  
50 is still reported to be the leading cause of death in seriously ill patients, and the incidence of  
51 sepsis has increased annually. Therefore, new insights into the causes of sepsis are urgently  
52 needed.

53 The gut microbiota is a complex ecosystem consisting of trillions of bacteria that live in the  
54 digestive tracts of humans and other animals (3). Growing evidence supports the key role of a  
55 healthy gut microbiota in promoting and maintaining a balanced immune response and in the  
56 establishment of the gut barrier immediately after birth (4, 5). Moreover, a dysbiotic state of the  
57 gut microbiota can lead to dysregulation of various processes, which can in turn contribute to the  
58 development of autoimmune conditions (6). For instance, the presence or overabundance of  
59 specific types of bacteria may contribute to inflammatory disorders such as IBD (6). Additionally,  
60 metabolites from certain members of the gut flora may influence host signaling pathways,  
61 contributing to disorders such as colon cancer and obesity. Sepsis is an extreme response to  
62 inflammation that has profound effects on all parts of the body. For decades, the gut has been  
63 regarded as the motor of sepsis (7), and it has recently been shown that a healthy gut microbiota

64 has a protective role during systemic inflammation. Thus, we hypothesized that intestinal  
65 bacteria play an important role in sepsis since the gut microbiota is associated with many  
66 diseases.

67 Probiotics are live microbes that have beneficial effects on human and animal health when  
68 ingested in sufficient amounts (8). Probiotics play an important role in maintaining the normal  
69 microbiota composition and have been used to treat or prevent a number of gut health disorders,  
70 such as irritable bowel syndrome, hypercholesterolemia, gastritis, gut infection, parasitic  
71 infestation, hypersensitivity (including food allergies), and even certain types of cancers (e.g.,  
72 colorectal cancer) (9, 10). The use of microbes as probiotics also hold potential for oral health in  
73 preventing and treating oral infections, dental plaque-related diseases, periodontal diseases and  
74 halitosis. Furthermore, probiotics can alleviate inflammation associated with some human  
75 diseases by promoting changes in the gut microbiota composition (11, 12). *Streptococcus*  
76 *thermophilus* is a highly effective probiotic that has well studied health benefits, including the  
77 production of antibiotics that prevent infections from pneumonia-causing microbes and *C.*  
78 *difficile* and can help to prevent ulcers (13-15).

79 In this study, we used a coculture system (probiotics and RAW264.7 cells) to assess the ability of  
80 probiotics to decrease the expression of inflammatory factors. We showed that *Streptococcus*  
81 *thermophilus* 19 can decrease the inflammation induced by Lps in RAW264.7 cells. Furthermore,  
82 we investigated the ability of *S. thermophilus* 19 to protect mice against Lps-induced  
83 inflammation and gut microbiota alterations when administered as a probiotic. We observed that  
84 the administration of *S. thermophilus* 19 as probiotics could alter the gut microbiota composition

85 of untreated mice or mice with Lps-induced sepsis, with the symptoms of sepsis mitigated in the  
86 latter group. Moreover, the levels of several inflammatory factors in various organs were  
87 correlated to a diverse gut microbiota composition. We hypothesize that supplementation of diets  
88 with probiotics protects visceral organs by reducing inflammation through alterations in the gut  
89 microbiota after sepsis.

## 90 **Results**

### 91 *Probiotics decrease the expression of inflammatory factors in vitro*

92 To assess the influence of the assayed probiotics on the expression of inflammatory factors, we  
93 developed a co-culture system (probiotics and RAW264.7 cells). After incubating for 6 hours,  
94 total RNA was extracted and the expression of inflammatory factors was assessed via  
95 quantitative RT-PCR. The Lps treatment increased the expression of inflammatory factors  
96 compared to the untreated group. After co-culturing with probiotics, we observed a reduction in  
97 inflammatory factor expression, particularly when cells were incubated *S. thermophilus* 19  
98 (Figure1). At the same time, we investigated the influence of *S. thermophilus* 19 on the cell  
99 viability after treatment 6 hours. Results showed that *S. thermophilus* 19 didn't affect the cell  
100 viability after co-culture 6 hours (Supplementary Figure1). Therefore, *S. thermophilus* 19 was  
101 chosen for further study.

### 102 *Probiotics effectively alleviated inflammation induced by sepsis*

103 At first, the influence of different doses of Lps on mice survival rate was investigated. All mice  
104 died when the concentration of Lps exceeded 2.5 mg/kg, even in mice administered probiotics  
105 (data not shown). However, nearly 60% of mice survived when administered probiotics together

106 with 2 mg/ml Lps, whereas only 20% of mice administered the same Lps without probiotics  
107 survived (Figure 2A). All mice treated with 1 mg/kg of Lps survived (Figure 2A). So, 1mg/kg  
108 Lps was chosen to investigate the influence of *S. thermophilus* 19 on gut microbiota and  
109 inflammation of sepsis. Mice treated with Lps lost approximately 10% of their body weight  
110 during the 48 hours after injection, while untreated mice did not lose weight (Supplementary  
111 Figure2A). Although all treated groups regained their baseline weight by the third day, mice  
112 treated with *S. thermophilus* 19 exhibited high rates of body weight recovery. Total food and  
113 water intake and the animal health conditions for all mice were recorded. The reason we  
114 recorded the total water and food is we keep one group of mice in a cage. Lps-treated mice with  
115 or without probiotics exhibited a reduction in total drinking water and rat chow intake  
116 (Supplementary Figure2B). Furthermore, mice treated with the probiotics alone also exhibited  
117 decreased water and rat chow intake (Supplementary Figure 2B). However, mice treated with *S.*  
118 *thermophilus* 19 alone showed no changes in body weight, although they exhibited lower  
119 drinking water and food intake (Supplementary Figure2A and 2B). The decrease in body weight  
120 of the Lps-treated mice could be explained by the Lps-induced inflammation causing a reduction  
121 in food and drinking water intake, while the probiotics could alleviate inflammation to promote  
122 the recovery in body weight.

123 We observed a 2-fold increase in TNF- $\alpha$  expression and 2.5-fold in IL-1 $\beta$  while it was reduced to  
124 that observed in the control group in mice administered probiotics (Figure 2B). In contrast, in  
125 mice treated with probiotics without Lps treatment, no significant effect on the serum levels of  
126 IL-1 $\beta$  and TNF- $\alpha$  were observed compared to the control group, demonstrating that the

127 probiotics has no influence on the host in the absence of sepsis.

128 Next, inflammation state of the kidneys, small intestines, livers and lungs of each mouse after

129 Lps and probiotic treatment was investigated. Lps treatment dramatically increased the

130 expression of IL-1 $\beta$ , IL-6 and TNF- $\alpha$  in all tissues while they were effectively rescued in the

131 mice treated with *S. thermophilus* 19 compared to the mice treated with Lps alone (Figure 2C).

132 However, the expression of TNF- $\alpha$ , IL-6 and IL-1 $\beta$  in the probiotic- -treated mice and control

133 mice did not significantly differ (Figure 2C). H&E staining revealed that compared with the liver

134 sections in control group mice, significant congestion of veins and hepatocyte necrosis was

135 observed in the Lps-treated mice, and the loss of intact liver plates and hepatocyte vacuolization

136 was observed (Figure 2D). In pulmonary sections, drastic destruction of alveolar structures was

137 detected in the Lps-treated mice, and the effusion in alveoli in these mice was markedly more

138 severe than that observed in the control group mice. Furthermore, tissue infiltration by

139 inflammatory cells was substantially higher in Lps-treated mice than in the control group mice.

140 Co-treatment with probiotics resulted in the restoration of a close-to-normal appearance of liver

141 and lung tissues. Moreover, *S. thermophilus* 19 treatment alone did not affect the liver and lung

142 sections of mice (Figure 2D).

### 143 ***Lps altered the gut microbiota structure of mice***

144 In the balance between gut microbiota and inflammation, deviations either way may cause

145 corresponding adjustments in the other. To test whether the gut microbiota of mice was altered

146 due to sepsis, we collected cecal feces of mice and assayed them via MiSeq sequencing to

147 determine the composition of gut microbiota. Mice treated with Lps exhibited decreases gut

148 microbiota richness compared to the control group (Chao1 index) ( $P < 0.05$ ) while no difference  
149 in diversity (Shannon index) between two groups was observed (Figure 3A and 3B). Gut  
150 microbiota of mice treated with Lps only clustered differently from those of the control group  
151 mice, demonstrating the significant effect of Lps on the gut microbiota (Figure 3C). The relative  
152 abundance of gut microbiota in control and Lps group was showed in Figure 3D. In details,  
153 compared to the control group, Lps-treated mice had lower abundances of bacteria belonging to  
154 the phylum *Fusobacteria* and of the genera *Fusobacterium* and *Psychrobacter* (Supplementary  
155 Figure 3A and 3B) ( $P < 0.05$ ). In contrast, higher abundances of bacteria from the genus  
156 *Flavonifractor* were observed in the Lps-treated mice. Interestingly, 8 OTUs were specifically  
157 present in the Lps-treatment group compared to the control group, while the control group also  
158 contained 8 specific OTUs (Supplementary Figure 4).

### 159 ***Probiotics intervention alters the gut microbiota of mice***

160 To investigate the effect of probiotics on the gut microbiota of mice, we sequenced the gut  
161 microbiota of the mice treated with probiotics alone. The diversity of gut microbiota differed for  
162 the various probiotics assayed compared to control group ( $P < 0.05$ ), while no difference in  
163 richness was observed among the groups (Figure 4A and 4B). Moreover, gut microbiota of mice  
164 treated with probiotics alone clustered differently from that of control group mice (Figure 4C).  
165 The relative abundance of gut microbiota in control and Lps group was showed in Figure 4D. In  
166 details, mice treated with *S. thermophilus* 19 exhibited a decreased abundance of bacteria  
167 belonging to the phylum *Bacteroidetes* and an increased abundance of the phylum *Firmicutes*.  
168 The changes in microbiota compositions in the 19 treatment mice is shown in Supplementary



169 Figure 3A and 3B ( $P < 0.05$ ). Nine OTUs were specifically present in the group treated with *S.*  
170 *thermophilus* 19 alone compared to control group, while control group also had 5 specific OTUs  
171 (Supplementary Figure 4).

### 172 ***Oral administration of Probiotics alleviated viscera damage via altering the gut microbiota***

173 We showed that probiotic intervention can attenuate the inflammation in septic mice (Figure 2).  
174 Furthermore, we previously reported that probiotics can reduce the inflammation induced by Cr  
175 (VI) in mice through modifying the gut microbiota. Thus, we hypothesized that the protection of  
176 viscera by the probiotic-induced attenuation of inflammation in septic mice is also associated  
177 with changes in the intestinal microbiota. To test this hypothesis, we sequenced the 16S rRNA  
178 gene variable (V) V3-V4 region of the fecal bacteria samples obtained from *S. thermophilus* 19  
179 treated Lps-treated mice (Lps7) and compared the results to those obtained from the mice treated  
180 with Lps alone and the control group. Overall, differences between the *S. thermophilus* 19- and  
181 Lps-treated mice were observed (Figure 5A and 5B). Meanwhile, gut microbiota of Lps+ *S.*  
182 *thermophilus* 19 groups clustered differently from mice treated with Lps alone group (Figure.5C),  
183 demonstrating the important effect of probiotics. Lps-treated mice administered *S. thermophilus*  
184 19 had lower abundance of *Clostridium\_XIVb* and a higher abundance of *Fusobacterium* and  
185 *Klebsiella*. Compared to the Lps group, Lps-treated mice administered *S. thermophilus* 19  
186 exhibited an increased abundance of *Fusobacteria* (Figure.5D, Supplementary Figure 3A and 3B)  
187 ( $P < 0.05$ ). Mice administered *S. thermophilus* 19 and treated with Lps had 8 specific OTUs  
188 compared to mice treated with Lps alone (Supplementary Figure 4).

189 Next, we compared the differences in gut microbiota composition between the probiotic- and

190 Lps-treated mice and the control group mice. Mice treated with Lps and *S. thermophilus* 19  
191 exhibited decreases gut microbiota richness compared to the control group (Chao1 index)  
192 ( $P < 0.05$ ) while no difference in diversity (Shannon index) between two groups was observed  
193 (Supplementary Figure 5A and 5B). The gut microbiota of mice treated with Lps and 19 clustered  
194 differently from that of the control group mice (Supplementary Figure 5C). The change in the  
195 microbiota composition between Lps+ *S. thermophilus* 19 and control groups is shown in  
196 Supplementary Figure 3 (in details) ( $P < 0.05$ ) and Supplementary Figure 5D. Six specific OTUs  
197 were identified in the LPS7 group mice and 9 were identified in the control group  
198 (Supplementary Figure 4). Taken together, these results indicated that all the treatments altered  
199 the composition of gut microbiota of the assayed mice. Although the composition of gut bacteria  
200 in mice treated with probiotic and that of control group differed, the expression of  
201 inflammation-associated factors in these mice did not significantly differ. We speculated that the  
202 gut microbiota in these exhibited a healthy status, whereas the probiotic and Lps-treated mice  
203 had a lower health status.

204 Overall, these data showed that Lps and probiotics significantly impacted the microbiota  
205 composition of mice.

### 206 **The function of gut microbiota was specifically altered after the administration oral** 207 **probiotics**

208 Next, we used a Kruskal-Wallis/Wilcoxon rank-sum test to determine how the altered  
209 community structure of the gut microbiota affects its function. Mice treated with Lps and *S.*  
210 *thermophilus* 19 were decreased in both primary bile acid biosynthesis and secondary bile acid

211 biosynthesis, which have proinflammatory properties compared to the Lps-treated mice  
212 (Figure6). These data suggest a significantly decreased proinflammatory signature, as well as an  
213 increased anti-inflammatory capacity of the gut microbiome in probiotic-treated mice. Taken  
214 together, the probiotics were observed to reshape the gut microbiota with a distinct composition,  
215 network topology and functionality.

## 216 **Discussion**

217 Sepsis is life-threatening organ dysfunction caused by a dysregulated host response to infection  
218 and often causes multiple organ damage. *S. thermophilus* has been shown to be highly effective  
219 probiotic strains with well-studied health benefits. However, the impact of *S. thermophilus* on  
220 the gut microbiota composition, and its influence on the inflammation caused by Lps-induced  
221 sepsis remains poorly understood. In this study, we utilized a MiSeq sequencing approach to  
222 assess how *S. thermophilus* 19 modulate the host fecal microbiota and inflammatory response in  
223 an Lps-induced mouse sepsis model. Our results showed that *S. thermophilus* 19 can decrease  
224 the expression of inflammatory factors RAW264.7 cells treated with Lps. Moreover, we showed  
225 that *S. thermophilus* 19 were able to protect viscera against damage induced by sepsis.  
226 Furthermore, *S. thermophilus* 19 could alter the microbiota composition and restore homeostasis  
227 of the gut microbiota disrupted by sepsis.

228 Inflammation and infection are frequently accompanied by an imbalance in the intestinal  
229 microflora(16). A strong inflammatory response may then be mounted against microfloral  
230 bacteria, leading to a perpetuation of the inflammation and gut barrier dysfunction(17). Sepsis is  
231 life-threatening organ dysfunction caused by a dysregulated host response to infection, which is

232 often causes a systemic inflammatory response. To assess the relationship between the gut  
233 microbiota and sepsis, we induced sepsis in mice through intraperitoneal injection of Lps (2  
234 mg/ml) and used a MiSeq sequencing-based approach to evaluate the gut microbiota  
235 compositions of the assayed mice. The results showed that the Lps treatment decreased the  
236 abundance of *Fusobacteria* and the richness of the intestinal microbiota. Moreover, the  
237 abundances of the genera *Fusobacterium*, *Flavonifractor* and *Psychrobacter* were altered in the  
238 septic mice. Previous studies showed that shifts in the intestinal *Firmicutes* to *Bacteroidetes* ratio,  
239 as well as reduced microbiota diversity(18, 19). However, these studies had many uncertainties  
240 with regard to the variability and temporal nature of sepsis-induced dysbiosis. Thus, we used an  
241 Lps-induced sepsis model to investigate the changes in gut microbiota composition to eliminate  
242 the influence of other factors. Our results suggest that the genera *Fusobacterium*, *Flavonifractor*  
243 and *Psychrobacter* may play important role in the development of sepsis.

244 We observed that Lps significantly upregulates the expression of genes involved in inflammation,  
245 especially in the livers, lungs, kidneys and small intestines of mice. Moreover, Lps induced  
246 sepsis has been demonstrated to result in the expression of inflammation-related genes in  
247 multiple organs(1). Probiotics are live microbial food supplements or bacterial components that  
248 have been shown to have beneficial effects on human health. Additionally, probiotics are often  
249 used to treat inflammation-related diseases, such as inflammatory bowel disease, allergic  
250 diseases, and acute gastroenteritis. *S. thermophilus* is probiotics that have been used to treat  
251 many illnesses. Probiotics containing *S. thermophilus* KB19 significantly increased betaine  
252 plasma levels in chronic kidney disease(20-23). Similarly, we observed that *S. thermophilus*

253 decreased the level of inflammatory factors in an LPS-induced sepsis mouse model. In addition,  
254 the administration of *S. thermophilus* 19 did not trigger any inflammation or dysbiosis of the gut  
255 microbiota, suggesting that they could safely be used to treat sepsis with no obvious harmful side  
256 effects. Thus, together with previous results, these results suggest that *S. thermophilus* 19 may be  
257 one alternative probiotics for use in sepsis intervention in the future.

258 It has now been recognized that alterations in gut microbiota composition and function appear to  
259 be an important mechanism by which probiotics alleviate human disease. Our results showed that  
260 the probiotics 19 altered the function of the gut microbiota in mice. In particular, mice treated  
261 with LPS and probiotics exhibited changes in the function of oxidative-phosphorylation and bile  
262 acid biosynthesis, which are important in inflammation-related diseases(24, 25). Moreover,  
263 probiotics also caused other functions of the gut microbiota to change. Meanwhile, mice treated  
264 with probiotics alone also exhibited changes in the function of the gut microbiota that may be  
265 good for host health by promoting low inflammatory factor expression and a good health state.  
266 Taken together, our results indicated that probiotics are good for host health despite the changes  
267 they induce in the composition and function of the gut microbiota.

268 In summary, we demonstrated that the probiotics *S. thermophilus* 19 can alleviate inflammation  
269 both *in vivo* and *in vitro*. This probiotics reduced the levels of inflammatory factors caused by  
270 sepsis, which may occur through multiple targets. For instance, probiotics can resistant some  
271 pathogenic bacteria enriched in gut after intraperitoneal injection of LPS, alter the functional  
272 potential of intestinal microbes, promote higher intestinal permeability, and alter the composition  
273 of the gut microbiota. These results suggest that the probiotics *S. thermophilus* 19 may be used to

274 treat to not only sepsis but also other systemic inflammatory diseases (inflammatory bowel  
275 disease, systemic inflammatory arthritis, multiple sclerosis and so on). Collectively, the results of  
276 our study provide a conceptual framework to further test this hypothesis in humans to treat  
277 sepsis and other systemic inflammatory diseases.

## 278 **Materials and Methods**

### 279 *Bacteria and media*

280 *L. plantarum* TW1-1, *Pediococcus acidilactici* XS40, *L. plantarum* DS45, *L. paracasei* LZU-D2,  
281 *L. delbruckii*, *L. casei* 18-10, *Streptococcus thermophilus* 19 were provided by Dr. Xusheng Guo  
282 (Lanzhou University, Lanzhou, China) which were isolated from yogurt. Bacterial strains were  
283 cultured in De Man, Rogosa, and Sharpe (MRS; Beijing Solarbio Science & Technology, Beijing,  
284 China) growth medium with exception of 19 and XS40, which were cultured in M17 growth  
285 medium (MRS; Beijing Solarbio Science & Technology, Beijing, China) supplemented with 1%  
286 lactose and MRS medium supplemented with 0.5% glucose, respectively. MRS and M17 agar  
287 medium (Beijing Solarbio Science & Technology, Beijing, China) were used to determine the  
288 CFU of the assayed probiotic strains.

### 289 *In vitro evaluation of inflammatory factors induced by probiotics*

290 The commercial immortal mouse macrophage cell line RAW264.7 was obtained from the  
291 American Type Culture Collection and was grown in Dulbecco's Modified Eagle's Medium  
292 (DMEM; Gibco, Gaithersburg, MD) supplemented with 10% heat-inactivated fetal bovine serum  
293 (FBS) under a humidified 10% CO<sub>2</sub> atmosphere at 37°C. In order to investigate the influence of  
294 probiotics, the cells were cultured in 12-well culture plates at 1×10<sup>6</sup> cells/well. The bacterial

295 strains were grown in MRS or M17 medium overnight (16 h), after which the cultures were  
296 diluted to an optical density (OD) of 0.3, washed with phosphate-buffered saline (PBS; pH 7.4),  
297 resuspended in PBS, and were used to infect the RAW264.7 cells at a multiplicity of infection  
298 (MOI) of 1:100 (cells/bacteria). The plates were incubated for 6 h at 37°C under a 10% CO<sub>2</sub>  
299 atmosphere and samples were collected to assess the levels of inflammatory factors by qRT-PCR.  
300 PBS without bacteria was used as negative control.

### 301 *Animals and sepsis model*

302 The 7-14-week-old BALB/c (H-2D<sup>d</sup>) mice (average weight 20g) used in this study were  
303 originally purchased from the Experimental Animal Center of The Fourth Military Medical  
304 University and were bred in our facility under specific-pathogen-free conditions. All animals  
305 were maintained under a 12 h light/dark cycle. In order to investigate the effect of Lps on the  
306 survival rate, mice were administered different doses of lipopolysaccharide (Lps) by  
307 intraperitoneal injection. To investigate the influence of probiotics on sepsis, mice were  
308 administered 1mg/kg lipopolysaccharide (Lps) by intraperitoneal injection, with a second dose  
309 administered 4 days after the first injection. The details of the experimental design are shown in  
310 Table 1. The names of the experimental groups were renamed because of sequencing  
311 requirements as follows: Lps7 denotes Lps+ *S. thermophilus* 19, 7 denotes *S. thermophilus* 19.  
312 All procedures and protocols used in this study conform to the institutional guidelines and were  
313 approved by the Ethics Committee of the Fourth Military Medical University.

### 314 *Weight, water and food intake measurements and sampling*

315 Body weight, water and food intake, and stool appearance were documented for all groups of

316 mice every other day throughout the experiment. After 1 week, livers, kidneys, lungs and small  
317 intestines were collected from each mouse and were divided into triplicate samples, with one  
318 stored in liquid nitrogen, a second stored in RNAiso Plus for RNA extraction, and the third was  
319 fixed in 4% (w/v) paraformaldehyde at 4°C for later histological analysis.

### 320 *Histology of different tissues*

321 After the animals were sacrificed, different tissue samples were collected. After fixation in 4%  
322 paraformaldehyde, tissue samples were embedded in paraffin and serially cut into 7-mm thick  
323 sections. Tissue slides were stained with hematoxylin and eosin (H&E) for histological analysis.

### 324 *Microbial DNA extraction and Illumina MiSeq sequencing*

325 Microbial DNA was extracted from the samples using an E.Z.N.A.® Stool DNA Kit (Omega  
326 BioTek, Norcross, GA, USA) according to manufacturer's protocols, and the DNA samples were  
327 assessed via PCR with the universal 16S rRNA primers 27F/1492R in our own lab. The DNA  
328 concentration and integrity were determined by electrophoresis on 1% agarose gels containing  
329 ethidium bromide and spectrophotometrically using an EPOCH instrument (BioTek). After  
330 confirmation, the DNA was lyophilized and sent for Illumina MiSeq sequencing and data  
331 analysis.

332 The gut microbiota compositions of mice were assessed via Illumina MiSeq sequencing  
333 (Genegy Biotech) targeting the V3-V4 region of the bacterial 16S ribosomal RNA gene using  
334 the primers 341F (5'-CCTACGGGNGGCWGCAG-3') and 785R  
335 (5'-GACTACHVGGGTATCTAATCC-3'), with an eight-base barcode sequence unique to each  
336 sample. The amplicons were extracted from 2% agarose gels and purified using an AxyPrep



337 DNA Gel Extraction Kit (Axygen Biosciences, Union City, CA, USA) according to the  
338 manufacturer's instructions and were subsequently quantified using a QuantiFluor™-ST  
339 instrument (Promega, USA). The purified amplicons were pooled in equimolar ratios and  
340 paired-end sequenced ( $2 \times 300$ ) on an Illumina MiSeq platform according to standard protocols.  
341 The raw reads were deposited at the NCBI Sequence Read Archive (SRA) database. Operational  
342 taxonomic units (OTUs) were clustered with a 97% similarity cutoff using UPARSE (version 7.1  
343 <http://drive5.com/uparse/>), and chimeric sequences were identified and removed using UCHIME.  
344 The taxonomy of each 16S rRNA gene sequence was analyzed using RDP classifier  
345 (<http://rdp.cme.msu.edu/>) against the SILVA (SSU123) 16S rRNA database using a confidence  
346 threshold of 70%. The taxonomy of each ITS gene sequence was analyzed using Unite classifier  
347 (<https://unite.ut.ee/index.php>).

#### 348 ***Quantitative RT-PCR for inflammatory factor determination***

349 Total RNA was extracted from different tissues using RNAiso Plus (Takara, Dalian, China) and  
350 was subsequently reverse transcribed into cDNA using PrimeScript™ RT Kit (Takara, Dalian,  
351 China) according to the manufacturer's protocol. The expression of inflammatory factor-related  
352 genes was analyzed using SYBR® PremixEx Taq™ II and the Bio-Rad CFX system. For  
353 real-time PCR, the reaction mixtures contained 1  $\mu$ L cDNA, 0.4  $\mu$ L of each primer ( $10 \text{ mmol}^{-1}$ ),  
354 5  $\mu$ L of SYBR green PCR Master Mix, and distilled water to a final reaction volume of 10  $\mu$ L.  
355 The Taq DNA polymerase was activated at 95°C for 10 min, followed by 40 cycles of 95°C for  
356 15 s, 60°C for 30 s, and 72°C for 30 s. Quantitative RT-PCR data were normalized to the  
357 expression of the housekeeping gene  $\beta$ -actin using the  $2^{-\Delta\text{Ct}}$  method. Primers used in this study

358 are shown in Table 2.

### 359 ***Quantification and statistical analysis***

360 Graphpad Prism was used for graphical presentation and statistical analyses. Differences were  
361 considered statistically significant at  $p < 0.05$ , and data are presented as the means  $\pm$  SEM. The  
362 number of biological replicates (n) and the number of independent experiments are indicated in  
363 the figure legends. The Kruskal-Wallis/Wilcoxon rank-sum test was used to analyze the gut  
364 microbiota composition data for all the groups.

### 365 **Acknowledgements**

366 We thank Dr. Xusheng Guo (Lanzhou University) for his assistance for supply our strains and  
367 Dr. Guodong Yang (Fourth Military Medical University) for his advice on data and statistical  
368 analysis. This work was supported by grants from Natural Science Foundation of China  
369 (81530064, 81801913, 81601680 and 81701902).

### 370 **Author contributions**

371 G.W. and D.H. designed and supervised the study. F.H., Y.Z. and X.Y. performed experiments  
372 and wrote the manuscript. S.H., Z.F., X.L. and W.C. conducted the animal trial and samples  
373 collection. D.X., W.Z. and J.L. helped with animal experiments and provided critical  
374 experimental materials and X.Y. conducted physiological data analysis. G.W., D.H. and Y.Z.  
375 analysed the data and edited the manuscript.

### 376 **Competing interests**

377 The authors declare that they have no conflict of interests

378

379 **References**

- 380 1. Bai X, He T, Liu Y, Zhang J, Li X, Shi J, Wang K, Han F, Zhang W, Zhang Y, Cai W, Hu  
381 D. 2018. Acetylation-dependent regulation of notch signaling in macrophages by sirt1  
382 affects sepsis development. *Front Immunol* 9:762.
- 383 2. Manning J. 2018. Sepsis in the burn patient. *Crit Care Nurs Clin North Am* 30:423-430.
- 384 3. Glenwright AJ, Pothula KR, Bhamidimarri SP, Chorev DS, Basle A, Firbank SJ, Zheng H,  
385 Robinson CV, Winterhalter M, Kleinekathofer U, Bolam DN, van den Berg B. 2017.  
386 Structural basis for nutrient acquisition by dominant members of the human gut  
387 microbiota. *Nature* 541:407-411.
- 388 4. Hand TW. 2016. The role of the microbiota in shaping infectious immunity. *Trends*  
389 *Immunol* 37:647-658.
- 390 5. Maynard CL, Elson CO, Hatton RD, Weaver CT. 2012. Reciprocal interactions of the  
391 intestinal microbiota and immune system. *Nature* 489:231-41.
- 392 6. Clemente JC, Manasson J, Scher JU. 2018. The role of the gut microbiome in systemic  
393 inflammatory disease. *BMJ* 360:j5145.
- 394 7. Carrico CJ, Meakins JL, Marshall JC, Fry D, Maier RV. 1986. Multiple-organ-failure  
395 syndrome. *Arch Surg* 121:196-208.
- 396 8. Isolauri E, Kirjavainen PV, Salminen S. 2002. Probiotics: a role in the treatment of  
397 intestinal infection and inflammation? *Gut* 50 Suppl 3:III54-III59.
- 398 9. Mombaerts P, Mizoguchi E, Grusby MJ, Glimcher LH, Bhan AK, Tonegawa S. 1993.  
399 Spontaneous development of inflammatory bowel disease in T cell receptor mutant mice.

- 400 Cell 75:274-82.
- 401 10. Doron S, Snyderman DR. 2015. Risk and safety of probiotics. Clin Infect Dis 60 Suppl  
402 2:S129-S134.
- 403 11. Wu G, Xiao X, Feng P, Xie F, Yu Z, Yuan W, Liu P, Li X. 2017. Gut remediation: a  
404 potential approach to reducing chromium accumulation using *Lactobacillus plantarum*  
405 TW1-1. Sci Rep 7:15000.
- 406 12. Hwang IY, Koh E, Wong A, March JC, Bentley WE, Lee YS, Chang MW. 2017.  
407 Engineered probiotic *Escherichia coli* can eliminate and prevent *Pseudomonas*  
408 *aeruginosa* gut infection in animal models. Nat Commun 8:15028.
- 409 13. Correa NB, Peret Filho LA, Penna FJ, Lima FM, Nicoli JR. 2005. A randomized formula  
410 controlled trial of *Bifidobacterium lactis* and *Streptococcus thermophilus* for prevention  
411 of antibiotic-associated diarrhea in infants. J Clin Gastroenterol 39:385-9.
- 412 14. Saavedra JM, Bauman NA, Oung I, Perman JA, Yolken RH. 1994. Feeding of  
413 *Bifidobacterium bifidum* and *Streptococcus thermophilus* to infants in hospital for  
414 prevention of diarrhoea and shedding of rotavirus. Lancet 344:1046-9.
- 415 15. Mater DD, Bretigny L, Firmesse O, Flores MJ, Mogenet A, Bresson JL, Corthier G. 2005.  
416 *Streptococcus thermophilus* and *Lactobacillus delbrueckii* subsp. *bulgaricus* survive  
417 gastrointestinal transit of healthy volunteers consuming yogurt. FEMS Microbiol Lett  
418 250:185-7.
- 419 16. Khosravi A, Yanez A, Price JG, Chow A, Merad M, Goodridge HS, Mazmanian SK. 2014.  
420 Gut microbiota promote hematopoiesis to control bacterial infection. Cell Host Microbe

- 421 15:374-81.
- 422 17. Schuijt TJ, Lankelma JM, Scicluna BP, de Sousa e Melo F, Roelofs JJ, de Boer JD,  
423 Hoogendijk AJ, de Beer R, de Vos A, Belzer C, de Vos WM, van der Poll T, Wiersinga  
424 WJ. 2016. The gut microbiota plays a protective role in the host defence against  
425 pneumococcal pneumonia. *Gut* 65:575-83.
- 426 18. Ojima M, Motooka D, Shimizu K, Gotoh K, Shintani A, Yoshiya K, Nakamura S, Ogura  
427 H, Iida T, Shimazu T. 2016. Metagenomic analysis reveals dynamic changes of whole gut  
428 microbiota in the acute phase of intensive care unit patients. *Dig Dis Sci* 61:1628-34.
- 429 19. Zaborin A, Smith D, Garfield K, Quensen J, Shakhsheer B, Kade M, Tirrell M, Tiedje J,  
430 Gilbert JA, Zaborina O, Alverdy JC. 2014. Membership and behavior of  
431 ultra-low-diversity pathogen communities present in the gut of humans during prolonged  
432 critical illness. *MBio* 5:e01361-e14.
- 433 20. Pantoflickova D, Corthesy-Theulaz I, Dorta G, Stolte M, Isler P, Rochat F, Enslin M,  
434 Blum AL. 2003. Favourable effect of regular intake of fermented milk containing  
435 *Lactobacillus johnsonii* on *Helicobacter pylori* associated gastritis. *Aliment Pharmacol*  
436 *Ther* 18:805-13.
- 437 21. Xin J, Zeng D, Wang H, Ni X, Yi D, Pan K, Jing B. 2014. Preventing non-alcoholic fatty  
438 liver disease through *Lactobacillus johnsonii* BS15 by attenuating inflammation and  
439 mitochondrial injury and improving gut environment in obese mice. *Appl Microbiol*  
440 *Biotechnol* 98:6817-29.
- 441 22. Chiva M, Soriano G, Rochat I, Peralta C, Rochat F, Llovet T, Mirelis B, Schiffrin EJ,

- 442           Guarner C, Balanzo J. 2002. Effect of *Lactobacillus johnsonii* La1 and antioxidants on  
443           intestinal flora and bacterial translocation in rats with experimental cirrhosis. *J Hepatol*  
444           37:456-62.
- 445 23.       Borges NA, Stenvinkel P, Bergman P, Qureshi AR, Lindholm B, Moraes C,  
446           Stockler-Pinto MB, Mafra D. 2018. Effects of probiotic supplementation on  
447           trimethylamine-N-oxide plasma levels in hemodialysis patients: a pilot study. doi:  
448           10.1007/s12602-018-9411-1. *Probiotics Antimicrob Proteins*:1-7.
- 449 24.       Sonnenburg JL, Backhed F. 2016. Diet-microbiota interactions as moderators of human  
450           metabolism. *Nature* 535:56-64.
- 451 25.       Wang J, Tang H, Zhang C, Zhao Y, Derrien M, Rocher E, van-Hylckama Vlieg JE,  
452           Strissel K, Zhao L, Obin M, Shen J. 2015. Modulation of gut microbiota during  
453           probiotic-mediated attenuation of metabolic syndrome in high fat diet-fed mice. *ISME J*  
454           9:1-15.
- 455
- 456
- 457
- 458
- 459
- 460
- 461
- 462

463 **Figure.1.** The expression of inflammatory factors (IL-1 $\beta$ , TNF- $\alpha$  and IL-6) in Lps-treated,  
464 probiotics-Lps treated and untreated RAW264.7 cells. Error bars represents SEM. Illustration  
465 represent the influence of *S. thermophilus* 19 on inflammatory factors. \*P<0.05, \*\*P<0.01.

466 **Figure.2.** Probiotics alleviate the inflammatory caused by Lps-induced sepsis. (A) Survival rates  
467 of mice with or without probiotics treatment after 48h stimulation with different dose of Lps  
468 (n=10). (B) Levels of IL-1 $\beta$  and TNF- $\alpha$  in blood were determined using commercial ELISA kits  
469 (n=8). (C) Probiotics intervention resulted in decreased inflammation small intestine, lung, liver  
470 and kidney (n=8). Error bars represents SEM. (D) Hematoxylin and eosin staining of liver, and  
471 lung tissues from different groups. Sections were examined and photographed under a  
472 microscope.

473 **Figure.3.** Lps induce significant impact on microbiota composition. (A) (B) Fecal microbiota  
474 alfa diversity. (C) PLS\_DA plot of fecal microbiota of Lps-treated or control mice. (D) The  
475 change of gut microbiota at phylum level.

476 **Figure.4.** *S. thermophilus* 19 induce significant impact on microbiota composition compared to  
477 control group mice. 7 represent *S. thermophilus* 19 (n=8). (A) (B) Fecal microbiota alfa diversity.  
478 (C) PLS\_DA plot of fecal microbiota of LPS-treated mice with or without *S. thermophilus* 19  
479 treatment. (D) The change of gut microbiota at phylum level.

480 **Figure.5.** *S. thermophilus* 19 induce significant impact on microbiota composition compared to  
481 Lps-treated mice. 7 represent *S. thermophilus* 19 (n=8). (A) (B) Fecal microbiota alfa diversity.  
482 (C) PLS\_DA plot of fecal microbiota of LPS-treated mice with or without *S. thermophilus* 19  
483 treatment. (D) The change of gut microbiota at phylum level.

484 **Figure.6.** The presence of *S. thermophilus* 19 induces changes in gut microbiota function after  
485 Lps treatment. Statistical comparison was performed by first testing normality using  
486 Kruskal-Wallis/Wilcoxon rank-sum test. Error bars represents SEM.

487 **Supplementary Figure1.** The effect of *S. thermophilus* 19 on cell viability was detected by  
488 CCK8 assay after co-culture 6hours. Error bars represents SEM.

489 **Supplementary Figure2.** The influence of *S. thermophilus* 19 and Lps on body weight, total rat  
490 chow and drinking water intake. (A) Body weight change and relative weight change  
491 (n=8/group). (B) Total rat chow intake and drinking water.

492 **Supplementary Figure3.** The details of the change of gut microbiota at phylum (A) and genus  
493 (B) level in different groups. Data with significant changes were showed in the figure (P<0.05).

494 **Supplementary Figure4.** Specific OTUS existed in different groups.

495 **Supplementary Figure5.** The gut microbiota composition between control group and  
496 co-treatment (19 and Lps) group (n=8). (A) (B) Fecal microbiota alfa diversity. (C) PLS\_DA plot  
497 of fecal microbiota of Lps-treated mice with *S. thermophilus* 19 treatment and control group. (D)  
498 The change of gut microbiota at phylum level.

499

500

501

502

503

504



505

506 Table1 Experimental design

| Group | Treatment Groups(n=8)          | Gavaging                      |
|-------|--------------------------------|-------------------------------|
| 1     | Control                        | PBS                           |
| 2     | Lps only                       | PBS                           |
| 3     | Lps+S. <i>thermophilus</i> 19  | PBS+S. <i>thermophilus</i> 19 |
| 4     | S. <i>thermophilus</i> 19 only | PBS+S. <i>thermophilus</i> 19 |

507 Lps: 1mg/ml; S. *thermophilus* 19:  $1 \times 10^9$  CFU/ml once every other day in 0.3 ml PBS. Mice received Lps(1mg/kg)  
508 through intraperitoneal injection. Mice received PBS and 19 via gavage.

509 Table2 Primers used in this study

| Primer         | Sequence(5'-3')                                     |
|----------------|-----------------------------------------------------|
| $\beta$ -actin | GTACGCCAACACAGTGCTG/CGTCATACTCCTGCTTGCTG            |
| IL-1 $\beta$   | GCTTCAGGCAGGCAGTATC/AGGATGGGCTCTTCTTCAAAG           |
| TNF- $\alpha$  | AGAGCTACAAGAGGATCACCAGCAG/TCAGATTTACGGGTCAACTTCACAT |
| IL-6           | GAGGATACTACTCCCAACAGACC/ AAGTGCATCATCGTTGTTTCATACA  |

510

511

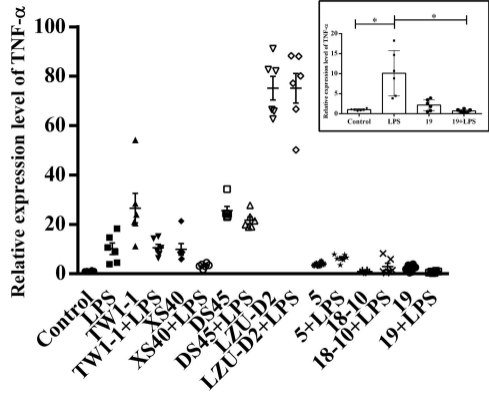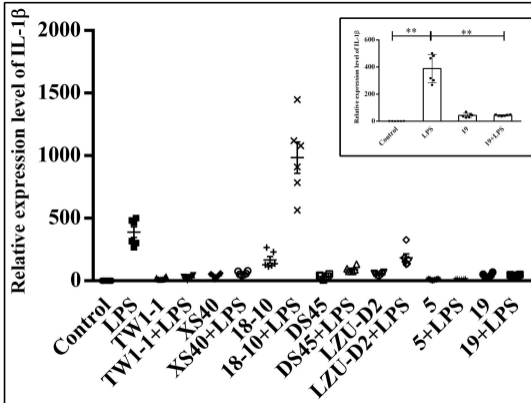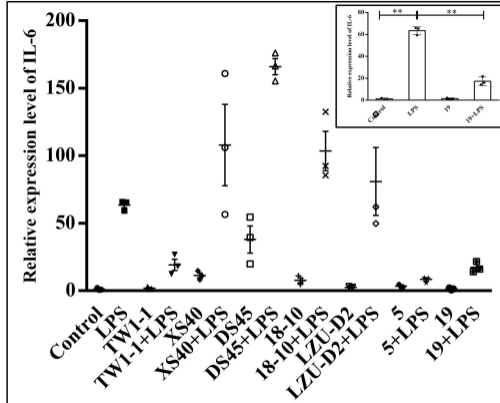

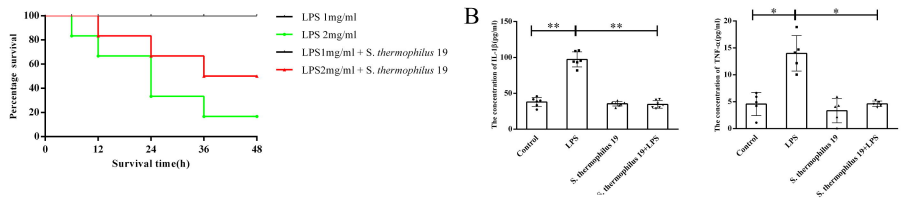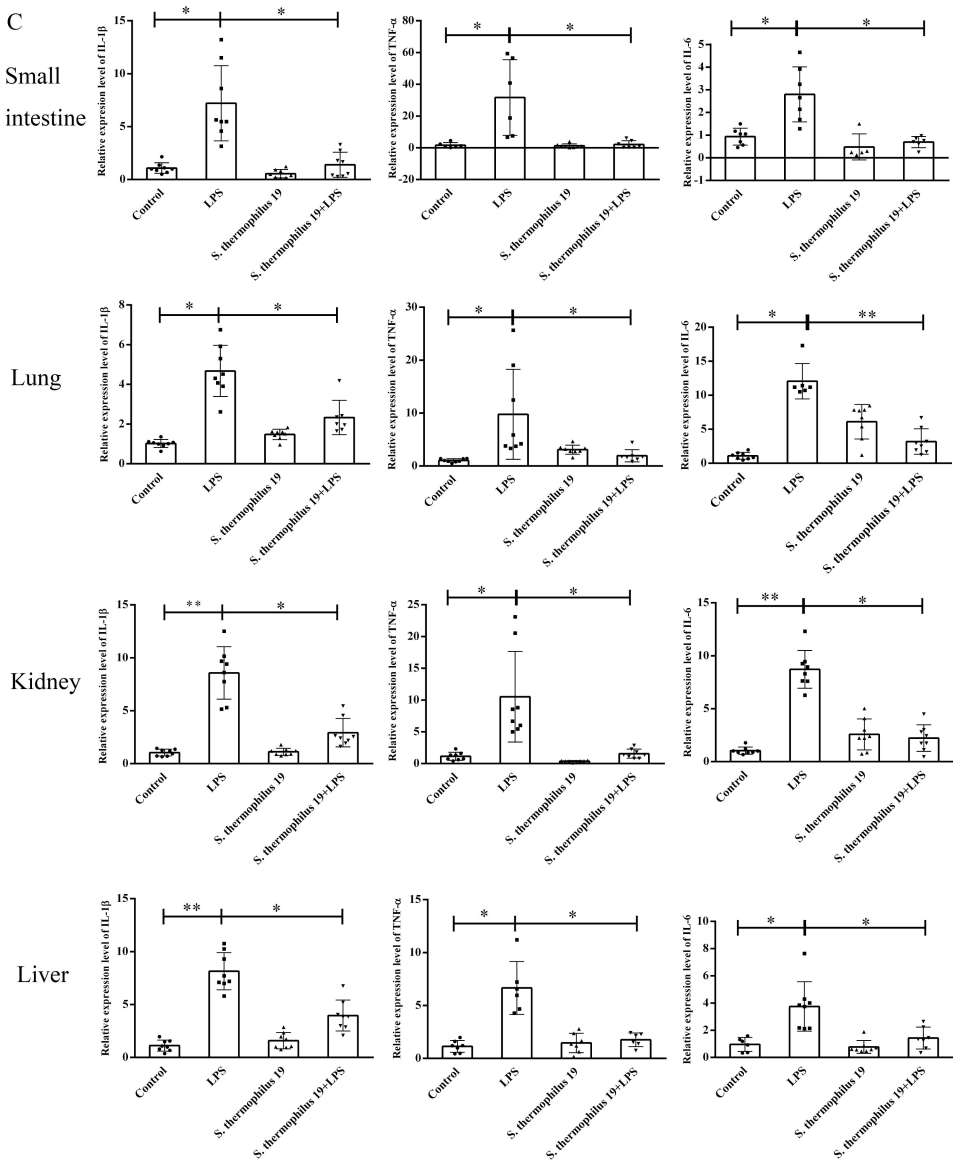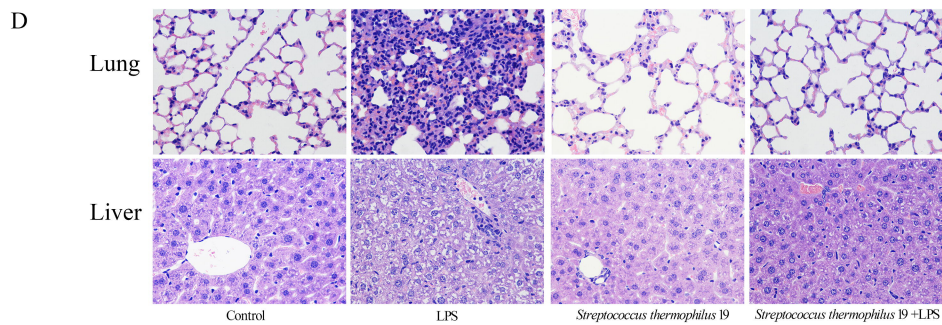

A

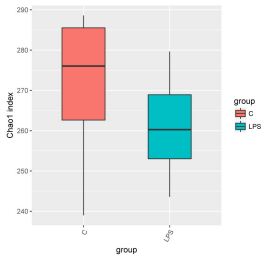

B

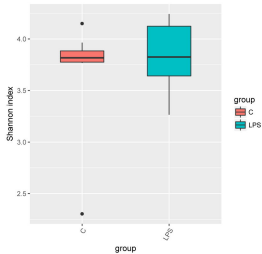

C

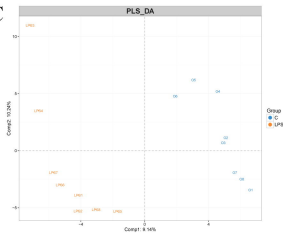

D

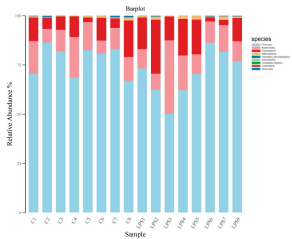

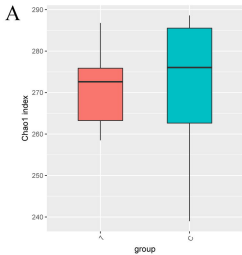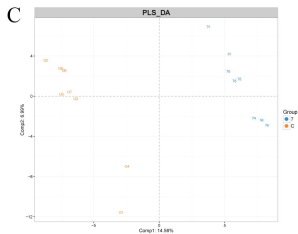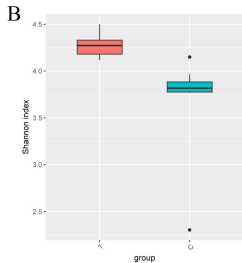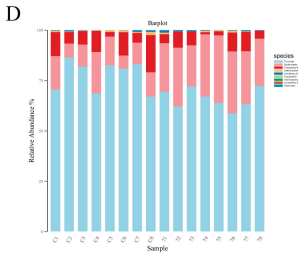

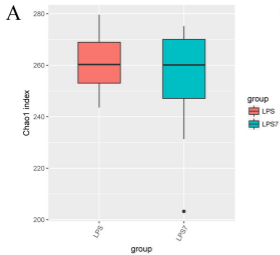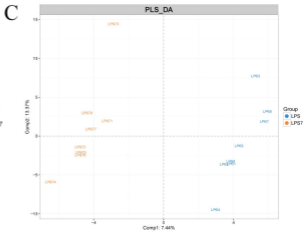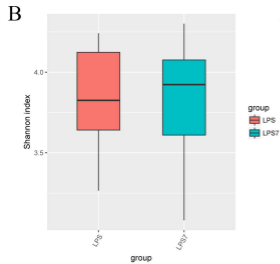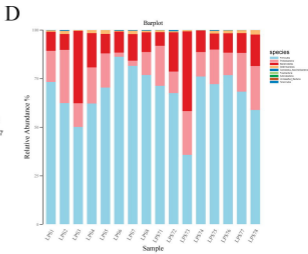

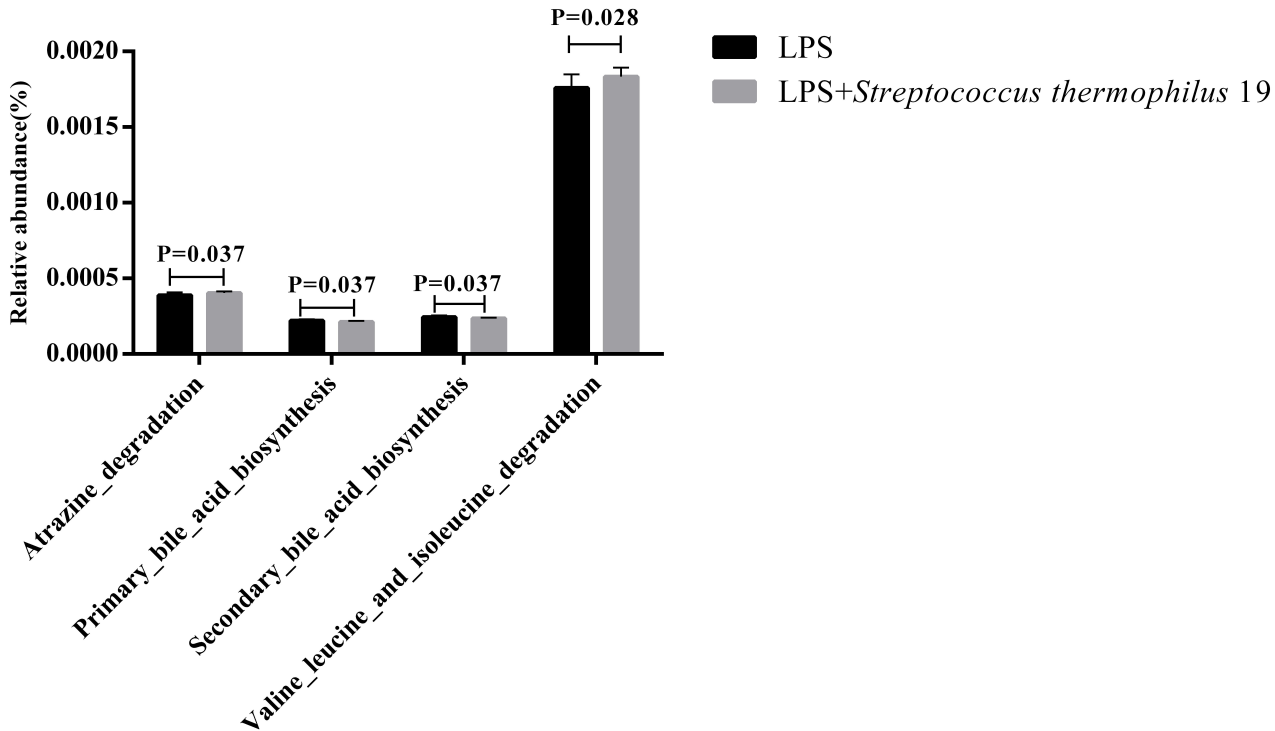

Source: http://biorxiv.org/content/10.1101/543967v2.full.pdf
